# Supplementary material for: Genomic Analysis of Two Representative Strains of Shewanella putrefaciens Isolated from Bigeye Tuna: Biofilm and Spoilage-Associated Behavior
Source: MDPI journal article supplement (doi:10.3390/foods11091261), 2022-04-27
Supplement: s1 [file s1]

**Table S1.** Quantitative real-time PCR primers used in this study.

| Gene name                                  | Forward primer (5'-3') | Reverse Primer (5'-3') |
|--------------------------------------------|------------------------|------------------------|
| 16 s rRNA                                  | ACTCCTACGGGAGGCAGCAG   | GTATTACCGCGGCTGCTGG    |
| K2227_07790 ( <i>S. putrefaciens</i> YZ08) | GGTTGGCTTTACATTCTCA    | TAATCTTCATCGCCTCTTT    |
| K3G22_06825 ( <i>S. putrefaciens</i> YZ-J) | AACGAGTATCAACCCACCG    | AGCCAACCTGCTTTTCATCT   |
| K2227_01670 ( <i>S. putrefaciens</i> YZ08) | TCTTAGTCATTATTGCGATTC  | CCTTGGTCACGACCCAGAG    |
| K3G22_01330 ( <i>S. putrefaciens</i> YZ-J) | TAGTTATTATTGCGATCCTC   | TCCTTAGTAACAACCCACA    |
| <i>speF</i> ( <i>S. putrefaciens</i> YZ08) | CTGGCTAACTTCTTACGGG    | GGCGGATGGTATAGTCTTG    |
| <i>speF</i> ( <i>S. putrefaciens</i> YZ-J) | TGTAGGTGCGGCTGTTGTC    | TTCCGTAGAAGTCAGTGTTA   |
| <i>flrA</i> ( <i>S. putrefaciens</i> YZ08) | TATGGCGATATTTGACAGG    | CAAGAGTTAGTTAGCCGAGT   |
| <i>flrA</i> ( <i>S. putrefaciens</i> YZ-J) | TTCTTTACCCGAACCACTG    | CTGCCTGTATTACTGATGACG  |
| <i>bpfA</i> ( <i>S. putrefaciens</i> YZ08) | GGGTTTATTCTCACTCACAGG  | GCACCAGCACTACTTACGC    |
| <i>bpfA</i> ( <i>S. putrefaciens</i> YZ-J) | TTTACGATCACAGCCAAAG    | TCACGCCAGAACTCAACTA    |
| <i>sirA</i> ( <i>S. putrefaciens</i> YZ08) | TTCGCCACAGTCCAACCCT    | CAAGCCGAGATAGCCCAGA    |
| <i>sirA</i> ( <i>S. putrefaciens</i> YZ-J) | TGGGTCACATAGGTCAAGG    | AAATCTACGGCAGAGTTCA    |
| <i>glgA</i> ( <i>S. putrefaciens</i> YZ08) | CTTTATCGCTCAGCACTATCC  | CCAAGACTCATCCTCGTTT    |
| <i>glgA</i> ( <i>S. putrefaciens</i> YZ-J) | ATCCGAATGCCTTTACCAA    | ATCCTTTAAGCCACCAACG    |
